# Supplementary material for: Association of neighbourhood migrant density and risk of non-affective psychosis: a national, longitudinal cohort study
Source: PubMed Central journal article supplement (PMC7083220; doi:10.1016/s2215-0366(20)30059-6), 2020-04
Supplement: mmc1.pdf [file mmc1.pdf]

# THE LANCET Psychiatry

## Supplementary appendix

This appendix formed part of the original submission and has been peer reviewed.  
We post it as supplied by the authors.

Supplement to: Dykxhoorn J, Lewis G, Hollander A-C, Kirkbride JB, Dalman C.  
Association of neighbourhood migrant density and risk of non-affective psychosis:  
a national, longitudinal cohort study. *Lancet Psychiatry* 2020; published online March 5.  
[https://doi.org/10.1016/S2215-0366\(20\)30059-6](https://doi.org/10.1016/S2215-0366(20)30059-6).

## Table of Contents

|                                                                                                                             |   |
|-----------------------------------------------------------------------------------------------------------------------------|---|
| Details for calculation of migrant density variables .....                                                                  | 2 |
| Table 1 Total sample and complete case sample, overall and by generation .....                                              | 3 |
| Table 2 Distribution of the migrant density proportion across neighbourhoods .....                                          | 4 |
| Table 3 Percent (%) migrants & children of migrants in each quintile of own-group migrant density,<br>by region .....       | 4 |
| Table 4 Neighbourhood level random effects.....                                                                             | 4 |
| Table 5 Total sample and complete case sample, overall and by generation .....                                              | 5 |
| Table 6 Strengthening the Reporting of Observational Studies in Epidemiology (STROBE) checklist<br>for cohort studies ..... | 5 |

### **Details for calculation of migrant density variables**

We utilized the 9,208 “Small Areas for Market Statistics” (SAMS) neighbourhoods maintained by Statistics Sweden. Each individual living in Sweden must register their address when they immigrate to Sweden or subsequently move house.<sup>1</sup> This allowed us to determine the total population in each neighbourhood by migrant status and region of origin, and estimate SAMS area-level characteristics including our migrant density exposures.

To permit valid estimates of migrant density, any neighbourhood with fewer than 50 people registered in 2011 was combined with its nearest neighbors using ArcGIS 10.5 until the minimum total population size was achieved, resulting in 8,047 neighbourhoods. For each neighbourhood, for each year (1997-2011), we obtained the total population size stratified by region-of-origin from the Register of the Total Population, divided into 8 categories: Nordic, Europe (excluding Nordic countries), Asia, Oceania, Middle East + North Africa, Sub-Saharan Africa, North America, and South America. Two additional categories were included for children of migrants where parents were from two different regions: (1) one Swedish parent and one migrant parent were classified as “Swedish-migrant”; (2) Two migrant parents from different regions were considered “mixed-migrant”. Probable visible minority density combined those from Asia, the Middle East, North Africa, Sub-Saharan Africa, and South America, and probable non-visible minorities were individuals from Nordic countries, Europe, Oceania, and North America. We selected these regions based on the assumption that migrants and children of migrants from these regions were probable visible minorities within Sweden. We excluded those with mixed ancestry from the analysis by probable visible minority status, as there would likely be higher misclassification within this group.

### **References**

1. Sundberg P. *The Swedish address system*. Lantmäteriverket, Stockholm, Sweden; 2010.

**Table 1 Total sample and complete case sample, overall and by generation**

| <b>OVERALL</b>              |                            | <b>Total</b> | <b>(n= 498,340)</b> | <b>Complete case (n=468,223)</b> |          | <b>Chi<sup>2</sup> (df);</b> |  |
|-----------------------------|----------------------------|--------------|---------------------|----------------------------------|----------|------------------------------|--|
|                             |                            | <b>n</b>     | <b>%</b>            | <b>n</b>                         | <b>%</b> | <b>p-value<sup>c</sup></b>   |  |
| Sex                         |                            |              |                     |                                  |          |                              |  |
|                             | Female                     | 244,070      | 49.0                | 229,045                          | 48.9     | 0.33 (1);<br>p=0.56          |  |
|                             | Male                       | 254,270      | 51.0                | 239,178                          | 51.1     |                              |  |
| Date of birth               |                            |              |                     |                                  |          |                              |  |
|                             | 1982-1986                  | 202,219      | 40.6                | 192,680                          | 41.2     | 68 (2);<br>p<0.001           |  |
|                             | 1987-1992                  | 158,265      | 31.8                | 151,508                          | 32.4     |                              |  |
|                             | 1993-1996                  | 134,892      | 27.1                | 124,035                          | 26.5     |                              |  |
|                             | Missing                    | 2,964        | 0.6                 | 0                                | 0.0      |                              |  |
| Region <sup>a</sup>         |                            |              |                     |                                  |          |                              |  |
|                             | Nordic <sup>b</sup>        | 79,600       | 16.0                | 78,012                           | 16.7     | 1,100(9);<br>p<0.001         |  |
|                             | Europe                     | 117,839      | 23.7                | 112,384                          | 24.0     |                              |  |
|                             | Asia                       | 62,970       | 12.6                | 52,234                           | 11.2     |                              |  |
|                             | Oceania                    | 1,196        | 0.2                 | 1,132                            | 0.2      |                              |  |
|                             | Middle East + North Africa | 118,182      | 23.7                | 115,047                          | 24.6     |                              |  |
|                             | sub-Saharan Africa         | 38,143       | 7.6                 | 35,699                           | 7.6      |                              |  |
|                             | North America              | 7,971        | 1.6                 | 7,279                            | 1.6      |                              |  |
|                             | South America              | 21,096       | 4.2                 | 15,985                           | 3.4      |                              |  |
|                             | Unknown                    | 220          | 0.0                 | 0                                | 0        |                              |  |
|                             | Swedish-migrant            | 37,917       | 7.6                 | 37,605                           | 8.0      |                              |  |
|                             | Mixed migrant              | 12,952       | 2.6                 | 12,846                           | 2.7      |                              |  |
|                             | Swedish-born, no parents   | 254          | 0.0                 | 0                                | 0.0      |                              |  |
| <b>MIGRANTS</b>             |                            | <b>Total</b> | <b>(n=296,895)</b>  | <b>Complete case (n=268,686)</b> |          |                              |  |
| Sex                         |                            |              |                     |                                  |          |                              |  |
|                             | Female                     | 146,140      | 49.2                | 132,057                          | 49.2     | 0.31 (1);<br>p=0.58          |  |
|                             | Male                       | 150,755      | 50.8                | 136,629                          | 50.8     |                              |  |
| Date of birth               |                            |              |                     |                                  |          |                              |  |
|                             | 1982-1986                  | 150,624      | 50.7                | 141,204                          | 52.6     | 427 (2)<br>p<0.001           |  |
|                             | 1987-1992                  | 90,315       | 30.4                | 83,695                           | 31.2     |                              |  |
|                             | 1993-1996                  | 54,239       | 18.3                | 43,787                           | 16.3     |                              |  |
|                             | Missing                    | 1,717        | 0.6                 | 0                                | 0.0      |                              |  |
| Region <sup>a</sup>         |                            |              |                     |                                  |          |                              |  |
|                             | Nordic <sup>b</sup>        | 22,080       | 7.4                 | 20,785                           | 7.7      | 1,200 (7)<br>p<0.001         |  |
|                             | Europe                     | 90,677       | 30.5                | 85,553                           | 31.8     |                              |  |
|                             | Asia                       | 54,737       | 18.4                | 44,050                           | 16.4     |                              |  |
|                             | Oceania                    | 1,190        | 0.4                 | 1,126                            | 0.4      |                              |  |
|                             | Middle East + North Africa | 76,115       | 25.6                | 73,298                           | 27.3     |                              |  |
|                             | sub-Saharan Africa         | 30,435       | 10.3                | 28,139                           | 10.5     |                              |  |
|                             | North America              | 7,394        | 2.5                 | 6,708                            | 2.5      |                              |  |
|                             | South America              | 14,047       | 4.7                 | 9,027                            | 3.4      |                              |  |
|                             | Unknown                    | 220          | 0.1                 | 0                                | 0.0      |                              |  |
| <b>Children of migrants</b> |                            | <b>Total</b> | <b>(n 201,191)</b>  | <b>Complete case (n=199,537)</b> |          |                              |  |
| Sex                         |                            |              |                     |                                  |          |                              |  |
|                             | Female                     | 97,804       | 48.6                | 96,988                           | 48.6     | 0.001 (1);<br>p=0.97         |  |
|                             | Male                       | 103,387      | 51.4                | 102,549                          | 51.4     |                              |  |
| Date of birth               |                            |              |                     |                                  |          |                              |  |
|                             | 1982-1986                  | 51,595       | 25.6                | 51,476                           | 25.8     | 0.20 (2);<br>p=0.90          |  |
|                             | 1987-1992                  | 67,950       | 33.8                | 67,813                           | 34.0     |                              |  |
|                             | 1993-1996                  | 80,653       | 40.1                | 80,248                           | 40.2     |                              |  |
|                             | Missing                    | 993          | 0.5                 | 0                                | 0.0      |                              |  |
| Region <sup>a</sup>         |                            |              |                     |                                  |          |                              |  |
|                             | Nordic <sup>b</sup>        | 57,520       | 28.6                | 57,227                           | 28.7     | 1.1 (9);<br>p=1.00           |  |
|                             | Europe                     | 27,162       | 13.5                | 26,831                           | 13.4     |                              |  |
|                             | Asia                       | 8,233        | 4.1                 | 8,184                            | 4.1      |                              |  |
|                             | Oceania                    | 6            | 0.0                 | 6                                | 0.0      |                              |  |
|                             | Middle East + North Africa | 42,067       | 20.9                | 41,749                           | 20.9     |                              |  |
|                             | sub-Saharan Africa         | 7,708        | 3.8                 | 7,560                            | 3.8      |                              |  |
|                             | North America              | 577          | 0.3                 | 571                              | 0.3      |                              |  |
|                             | South America              | 7,049        | 3.5                 | 6,958                            | 3.5      |                              |  |
|                             | Swedish-migrant            | 37,917       | 18.8                | 37,605                           | 18.8     |                              |  |
|                             | Mixed migrant              | 12,952       | 6.4                 | 12,846                           | 6.4      |                              |  |
|                             | Swedish-born, no parents   | 254          | 0.1                 | 0                                | 0.0      |                              |  |

<sup>a</sup> Region of birth for migrants, region of parental birth for children of migrants; <sup>b</sup> Includes Children of migrants with one Nordic-born parent and one Swedish-born parent; <sup>c</sup> Chi-squared test, degrees of freedom, p-value

**Table 2**      **Distribution of the migrant density proportion across neighbourhoods**

|                                                    | Mean  | SD    | Median | IQR   |       | Min    | Max   |
|----------------------------------------------------|-------|-------|--------|-------|-------|--------|-------|
|                                                    |       |       |        | 25%   | 75%   |        |       |
| Own-region migrant density                         | 0.104 | 0.115 | 0.064  | 0.030 | 0.130 | 0.0001 | 0.800 |
| Generation-specific density (migrants)             | 0.079 | 0.084 | 0.049  | 0.022 | 0.106 | 0.0001 | 0.587 |
| Generation-specific density (children of migrants) | 0.044 | 0.043 | 0.034  | 0.015 | 0.056 | 0.0001 | 0.355 |
| Visible minority density                           | 0.251 | 0.214 | 0.183  | 0.070 | 0.387 | 0.0012 | 0.947 |

**Table 3**      **Percent (%) migrants & children of migrants in each quintile of own-group migrant density, by region**

|                            | Quintile 1 | Quintile 2 | Quintile 3 | Quintile 4 | Quintile 5 |
|----------------------------|------------|------------|------------|------------|------------|
| Own-group (overall)        | 17.6       | 20.3       | 20.6       | 20.7       | 20.7       |
| Nordic                     | 0.3        | 12.2       | 36.5       | 36.6       | 14.3       |
| Europe                     | 5.2        | 18.0       | 24.6       | 28.5       | 23.8       |
| Asia                       | 32.2       | 28.6       | 16.2       | 17.0       | 6.0        |
| Oceania                    | 100.0      | 0.0        | 0.0        | 0.0        | 0.0        |
| Middle East + North Africa | 11.9       | 13.9       | 12.2       | 18.8       | 43.2       |
| sub-Saharan Africa         | 32.7       | 21.1       | 14.5       | 14.3       | 17.4       |
| North America              | 92.2       | 4.3        | 2.2        | 1.4        | 0.0        |
| South America              | 48.6       | 32.4       | 14.5       | 3.9        | 0.6        |
| Swedish-migrant            | 16.6       | 55.4       | 27.3       | 0.8        | 0.0        |
| Mixed migrant              | 95.1       | 4.9        | 0.0        | 0.0        | 0.0        |

**Table 4**      **Neighbourhood level random effects**

| Neighbourhood-level random effects | Sigma | 95% CI |      | p-value |
|------------------------------------|-------|--------|------|---------|
| Null model                         | 0.04  | 0.02   | 0.08 | 0.0001  |
| Unadjusted model                   | 0.05  | 0.03   | 0.08 | <0.001  |
| Individual-adjusted model          | 0.07  | 0.04   | 0.11 | <0.001  |
| Neighbourhood-adjusted model       | 0.03  | 0.02   | 0.07 | <0.001  |
| Fully adjusted                     | 0.06  | 0.04   | 0.10 | 0.001   |

**Table 5 Migrant density by generation and region**

|                             | Migrants         |        |                   |        | Children of migrants |        |      |        |
|-----------------------------|------------------|--------|-------------------|--------|----------------------|--------|------|--------|
|                             | aHR <sup>a</sup> | 95% CI | CI                | AIC    | aHR <sup>a</sup>     | 95% CI | CI   | AIC    |
| Adjusted + region           |                  |        |                   |        |                      |        |      |        |
| Quintile 1 (lowest)         | 1.30             | 1.08   | 1.56*             | 36,011 | 1.03                 | 0.83   | 1.27 | 33,240 |
| Quintile 2                  | 1.12             | 0.95   | 1.32              |        | 1.01                 | 0.85   | 1.20 |        |
| Quintile 3                  | 1.05             | 0.89   | 1.22              |        | 0.98                 | 0.84   | 1.15 |        |
| Quintile 4                  | 1.08             | 0.93   | 1.24              |        | 0.94                 | 0.81   | 1.09 |        |
| Quintile 5 (highest - ref.) | 1                |        |                   |        | 1                    |        |      |        |
| 5% decrease                 | 1.03             | 1.00   | 1.06 <sup>d</sup> | 36,011 | 1.00                 | 0.97   | 1.03 | 33,235 |
| Neighbourhood random effect | 0.13             | 0.09   | 0.20              |        | 0.44                 | 0.40   | 0.48 |        |

HR: Hazard ratio; 95%CI: 95% confidence interval

\* p<0.05

<sup>a</sup> Individual + family confounders: age, sex, lone dwelling, family income, social welfare, unemployment, lone dwelling, and time since migration (migrants only). Neighbourhood confounders: deprivation index, population density, and proportion lone dwelling

<sup>b</sup> Includes children of migrants with one Nordic-born parent and one Swedish-born parent

<sup>c</sup> Numbers were too low in Oceania group for the model to converge, so excluded from this analysis

<sup>d</sup> p=0.04

**Table 6 Strengthening the Reporting of Observational Studies in Epidemiology (STROBE) checklist for cohort studies**

|                           | Item No | Recommendation                                                                                                                                                                                    |                                     |
|---------------------------|---------|---------------------------------------------------------------------------------------------------------------------------------------------------------------------------------------------------|-------------------------------------|
| <b>Title and abstract</b> | 1       | (a) Indicate the study's design with a commonly used term in the title or the abstract (pages 1 & 5)                                                                                              | <input checked="" type="checkbox"/> |
|                           |         | (b) Provide in the abstract an informative and balanced summary of what was done and what was found (page 5)                                                                                      | <input checked="" type="checkbox"/> |
| <b>Introduction</b>       |         |                                                                                                                                                                                                   |                                     |
| Background/rationale      | 2       | Explain the scientific background and rationale for the investigation being reported (pages 7-8)                                                                                                  | <input checked="" type="checkbox"/> |
| Objectives                | 3       | State specific objectives, including any prespecified hypotheses (page 8)                                                                                                                         | <input checked="" type="checkbox"/> |
| <b>Methods</b>            |         |                                                                                                                                                                                                   |                                     |
| Study design              | 4       | Present key elements of study design early in the paper (pages 8-9)                                                                                                                               | <input checked="" type="checkbox"/> |
| Setting                   | 5       | Describe the setting, locations, and relevant dates, including periods of recruitment, exposure, follow-up, and data collection (pages 8-9)                                                       | <input checked="" type="checkbox"/> |
| Participants              | 6       | (a) Give the eligibility criteria, and the sources and methods of selection of participants. Describe methods of follow-up (pages 8-9)                                                            | <input checked="" type="checkbox"/> |
| Variables                 | 7       | Clearly define all outcomes, exposures, predictors, potential confounders, and effect modifiers. Give diagnostic criteria, if applicable (pages 9-10)                                             | <input checked="" type="checkbox"/> |
| Data sources/measurement  | 8*      | For each variable of interest, give sources of data and details of methods of assessment (measurement). Describe comparability of assessment methods if there is more than one group (pages 9-10) | <input checked="" type="checkbox"/> |
| Bias                      | 9       | Describe any efforts to address potential sources of bias (page 11)                                                                                                                               | <input checked="" type="checkbox"/> |
| Study size                | 10      | Explain how the study size was arrived at (Figure 1, supplement Table 1)                                                                                                                          | <input checked="" type="checkbox"/> |
| Quantitative variables    | 11      | Explain how quantitative variables were handled in the analyses. If applicable, describe which groupings were chosen and why (pages 9-10)                                                         | <input checked="" type="checkbox"/> |

|                          |     |                                                                                                                                                                                                                        |                                     |
|--------------------------|-----|------------------------------------------------------------------------------------------------------------------------------------------------------------------------------------------------------------------------|-------------------------------------|
| Statistical methods      | 12  | (a) Describe all statistical methods, including those used to control for confounding (pages 10-11)                                                                                                                    | <input checked="" type="checkbox"/> |
|                          |     | (b) Describe any methods used to examine subgroups and interactions (page 11)                                                                                                                                          | <input checked="" type="checkbox"/> |
|                          |     | (c) Explain how missing data were addressed (page 12)                                                                                                                                                                  | <input checked="" type="checkbox"/> |
|                          |     | (d) If applicable, explain how loss to follow-up was addressed                                                                                                                                                         | NA                                  |
|                          |     | (e) Describe any sensitivity analyses                                                                                                                                                                                  | NA                                  |
| <b>Results</b>           |     |                                                                                                                                                                                                                        |                                     |
| Participants             | 13* | (a) Report numbers of individuals at each stage of study—eg numbers potentially eligible, examined for eligibility, confirmed eligible, included in the study, completing follow-up, and analysed (Figure 1)           | <input checked="" type="checkbox"/> |
|                          |     | (b) Give reasons for non-participation at each stage (Figure 1)                                                                                                                                                        | <input checked="" type="checkbox"/> |
|                          |     | (c) Consider use of a flow diagram (Figure 1)                                                                                                                                                                          | <input checked="" type="checkbox"/> |
| Descriptive data         | 14* | (a) Give characteristics of study participants (eg demographic, clinical, social) and information on exposures and potential confounders (Table 1)                                                                     | <input checked="" type="checkbox"/> |
|                          |     | (b) Indicate number of participants with missing data for each variable of interest (Table 1)                                                                                                                          | <input checked="" type="checkbox"/> |
|                          |     | (c) Summarise follow-up time (eg, average and total amount) (page 11, Table 1 & 4)                                                                                                                                     | <input checked="" type="checkbox"/> |
| Outcome data             | 15* | Report numbers of outcome events or summary measures over time (Table 1)                                                                                                                                               | <input checked="" type="checkbox"/> |
| Main results             | 16  | (a) Give unadjusted estimates and, if applicable, confounder-adjusted estimates and their precision (eg, 95% confidence interval). Make clear which confounders were adjusted for and why they were included (Table 2) | <input checked="" type="checkbox"/> |
|                          |     | (b) Report category boundaries when continuous variables were categorized (Table 2)                                                                                                                                    | <input checked="" type="checkbox"/> |
|                          |     | (c) If relevant, consider translating estimates of relative risk into absolute risk for a meaningful time period                                                                                                       | NA                                  |
| Other analyses           | 17  | Report other analyses done—eg analyses of subgroups and interactions, and sensitivity analyses (Table 3-4, Supplemental tables)                                                                                        | <input checked="" type="checkbox"/> |
| <b>Discussion</b>        |     |                                                                                                                                                                                                                        |                                     |
| Key results              | 18  | Summarise key results with reference to study objectives (page 14)                                                                                                                                                     | <input checked="" type="checkbox"/> |
| Limitations              | 19  | Discuss limitations of the study, taking into account sources of potential bias or imprecision. Discuss both direction and magnitude of any potential bias (pages 14-15)                                               | <input checked="" type="checkbox"/> |
| Interpretation           | 20  | Give a cautious overall interpretation of results considering objectives, limitations, multiplicity of analyses, results from similar studies, and other relevant evidence (pages 16-18)                               | <input checked="" type="checkbox"/> |
| Generalisability         | 21  | Discuss the generalisability (external validity) of the study results (pages 16-18)                                                                                                                                    | <input checked="" type="checkbox"/> |
| <b>Other information</b> |     |                                                                                                                                                                                                                        |                                     |
| Funding                  | 22  | Give the source of funding and the role of the funders for the present study and, if applicable, for the original study on which the present article is based (page 6)                                                 | <input checked="" type="checkbox"/> |

\*Give information separately for exposed and unexposed groups.
